# Supplementary material for: Predicting 10-Year Risk of End-Organ Complications of Type 2 Diabetes With and Without Metabolic Surgery: A Machine Learning Approach
Source: Oxford University Press journal article supplement (doi:10.2337/dc19-2057), 2020-02-06
Supplement: dc192057supplementarydata.pdf [file dc192057supplementarydata.pdf]

## SUPPLEMENTARY DATA

### **Supplementary File**

Aminian A, Zajichek A, Arterburn DE, et al. *Predicting 10-Year Risk of End-Organ Complications of Type 2 Diabetes with and without Metabolic Surgery: A Machine Learning Approach*. Diabetes Care.

**Supplementary Table 1.** Diagnosis and Procedure Codes for Study Outcomes

**Supplementary Table 2.** Ranking of Importance of Selected Variables in the Prediction Models for Surgical and Non-Surgical Patients

**Supplementary Figure 1.** Calibration plots of IDC Risk Scores and RECODE Models for Prediction of Mortality, Heart Failure, and Nephropathy in Nonsurgical Patients.

# SUPPLEMENTARY DATA

**Supplementary Table 1.** Diagnosis and Procedure Codes for Study Outcomes

| Outcome                                                       | Codes                                                                                                                                                                                                                                                                                                                                                                                                                                              |
|---------------------------------------------------------------|----------------------------------------------------------------------------------------------------------------------------------------------------------------------------------------------------------------------------------------------------------------------------------------------------------------------------------------------------------------------------------------------------------------------------------------------------|
| Coronary artery disease                                       | <p><u>ICD9 (diagnoses)</u>: 410.X, <b>411.X</b>, 411.X AND <b>414.X</b></p> <p><u>ICD9 (procedure)</u>: 36.01, 36.02, 36.03, 36.05, 36.06, 36.07, 36.10, 36.11, 36.12, 36.13, 36.14, 36.15, 36.16, 36.17, 36.19, 36.31, 36.32, 36.33, 36.64</p> <p><u>CPT-4</u>: 92982, 92984, 92995, 92996, 92980, 92981, 33510, 33511, 33512, 33513, 33514, 33516, 33517, 33518, 33519, 33521, 33522, 33523, 33530, 33533, 33534, 33535, 33536, 93539, 93540</p> |
| Heart failure                                                 | <p><u>ICD9</u>: 428.0, 428.1, 428.20, 428.21, 428.22, 428.23, 428.30, 428.31, 428.32, 428.33, 428.40, 428.41, 428.42, 428.43, 428.9</p>                                                                                                                                                                                                                                                                                                            |
| Nephropathy                                                   | <p>≥2 measures of eGFR less than 60 mL/min separated by at least 90 days without any intervening values ≥ 60 mL/min. The eGFR is approximated using MDRD equation.</p>                                                                                                                                                                                                                                                                             |
| * <b>Bolded text</b> indicates it must be a primary diagnosis |                                                                                                                                                                                                                                                                                                                                                                                                                                                    |

# SUPPLEMENTARY DATA

**Supplementary Table 2.** Ranking of Importance of Selected Variables in the Prediction Models for Surgical and Non-Surgical Patients

|             | All-cause mortality |              | Coronary events |              | Heart failure |              | Nephropathy |              |
|-------------|---------------------|--------------|-----------------|--------------|---------------|--------------|-------------|--------------|
|             | Surgical            | Non-surgical | Surgical        | Non-surgical | Surgical      | Non-surgical | Surgical    | Non-surgical |
| Age         | 1                   | 1            | 1               | 2            | 1             | 1            | 2           | 2            |
| Sex         | 8                   | 9            | 3               | 1            | 12            | 12           | 9           | 21           |
| BMI         | 2                   | 4            | 19              | 9            | 2             | 2            | 5           | 18           |
| Smoking     | 5                   | 5            | 6               | 5            | 13            | 13           | 14          | 16           |
| Systolic BP | 14                  | 13           | 12              | 18           | 6             | 5            | 8           | 5            |
| HbA1c       | 18                  | 15           | 15              | 6            | 3             | 3            | 3           | 9            |
| eGFR        | 11                  | 14           | 4               | 10           | 17            | 19           | 1           | 1            |

BMI: body mass index, BP: blood pressure, eGFR: estimated glomerular filtration rate, HbA1c: glycated hemoglobin.

# SUPPLEMENTARY DATA

**Supplementary Figure 1.** Calibration plots of IDC Risk Scores (red) and RECODE Models (green) for Prediction of Mortality, Heart Failure, and Nephropathy in Nonsurgical Patients. The closer the points lie along the 45-degree line, the better the calibration.

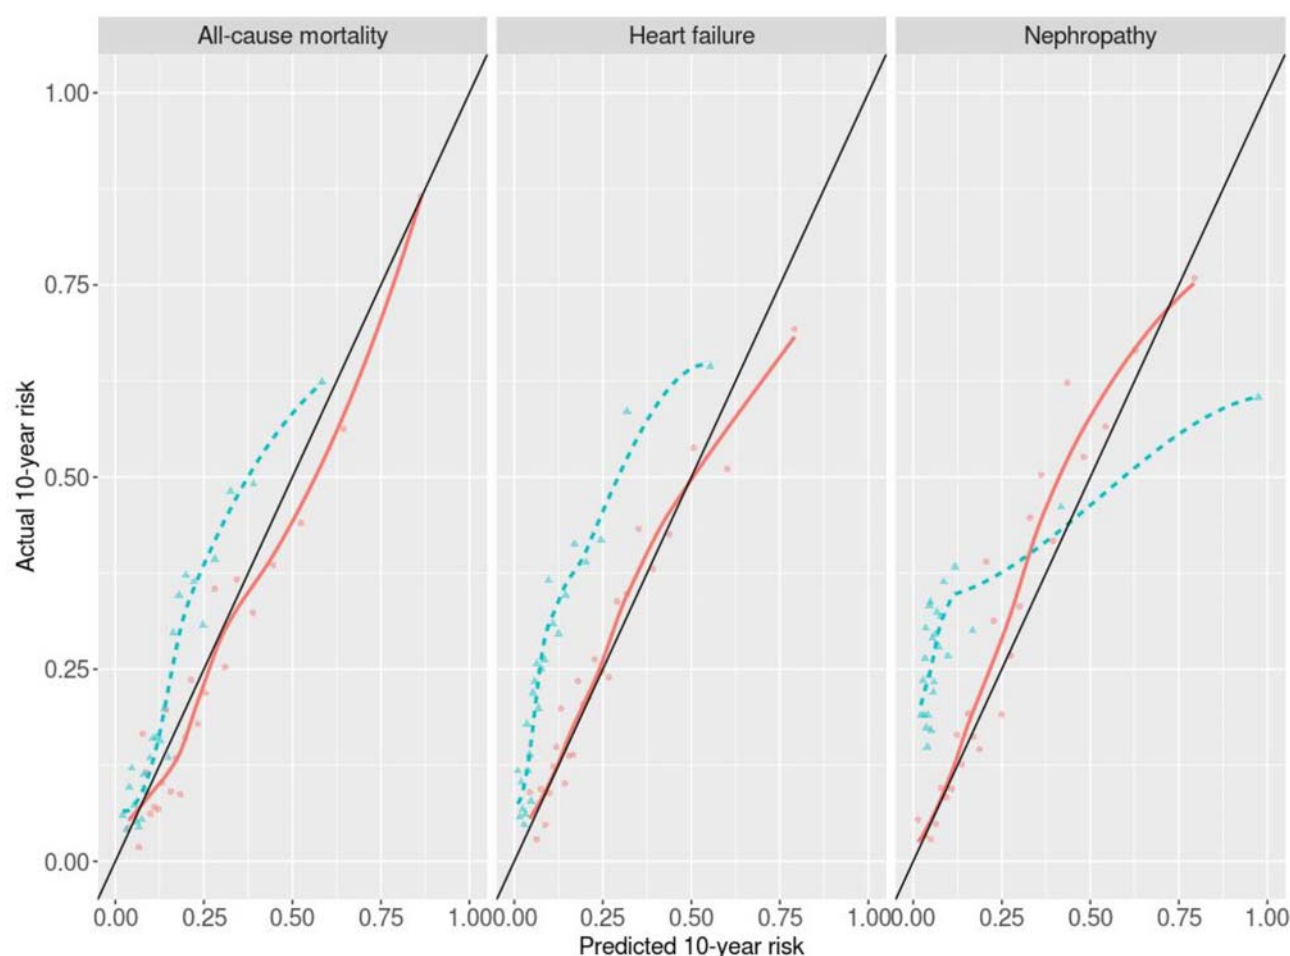

The IDC Risk Scores outperformed RECODE on 3 examined outcomes in terms of IPA, AUC, and calibration. Calibration of mortality prediction models were further assessed with the Greenwood-D'Agostino-Nam (GND) test which is a Cox model equivalent to the Hosmer-Lemeshow test in a survival analysis setting. The

GND test non-parametrically estimates the distance between predicted and observed Kaplan-Meier outcome rates. The higher p value shows a greater concordance between the predicted and observed outcome rates. For mortality prediction models in nonsurgical patients, the p-values were 0.145 and <0.001 for IDC Risk Scores and RECODE, respectively. This indicated significant miscalibration for the RECODE but not for the IDC Risk Scores on the examined cohort.
